# Supplementary material for: Silver(i) complexes with a P–N hybrid ligand and oxyanions: synthesis, structures, photocatalysis and photocurrent responses
Source: Royal Society of Chemistry journal article supplement (doi:10.1039/c6dt01211f), 2016-01-01
Supplement: c6dt01211f1.pdf [file c6dt01211f1.pdf]

## Electronic Supplementary Information

### **Silver(I) complexes with a P-N hybrid ligand and oxyanions: synthesis, structures, photocatalysis and photocurrent responses**

Jian-Feng Wang,<sup>a</sup> Shi-Yuan Liu,<sup>a</sup> Zhi-Gang Ren<sup>\*a</sup> and Jian-Ping Lang<sup>\*,a,b</sup>

<sup>a</sup> *College of Chemistry, Chemical Engineering and Materials Science, Soochow University, Suzhou 215123, P. R. China*

<sup>b</sup> *State Key Laboratory of Organometallic Chemistry, Shanghai Institute of Organic Chemistry, Chinese Academy of Sciences, Shanghai 200032, P. R. China*

*\*E-mail: jplang@suda.edu.cn*

## Table of Contents

|                                                                                                                                                                                                                 |     |
|-----------------------------------------------------------------------------------------------------------------------------------------------------------------------------------------------------------------|-----|
| <b>Figure S1.</b> PXRD patterns for <b>1–5</b> : simulated from single crystal data (Black) and single-phase polycrystalline sample (Red).....                                                                  | S4  |
| <b>Figure S2.</b> PXRD patterns for <b>6</b> and <b>7</b> : simulated from single crystal data (Black), single-phase polycrystalline sample (Red), and samples after catalyzed the photodegradation of RhB..... | S4  |
| <b>Figure S3.</b> $^1\text{H}$ NMR and $^{31}\text{P}\{^1\text{H}\}$ NMR spectra of 3-bdppmapy.....                                                                                                             | S5  |
| <b>Figure S4.</b> $^1\text{H}$ NMR and $^{31}\text{P}\{^1\text{H}\}$ NMR spectra of compound <b>1</b> .....                                                                                                     | S6  |
| <b>Figure S5.</b> $^1\text{H}$ NMR and $^{31}\text{P}\{^1\text{H}\}$ NMR spectra of compound <b>2</b> .....                                                                                                     | S7  |
| <b>Figure S6.</b> $^1\text{H}$ NMR and $^{31}\text{P}\{^1\text{H}\}$ NMR spectra of compound <b>3</b> .....                                                                                                     | S8  |
| <b>Figure S7.</b> $^1\text{H}$ NMR and $^{31}\text{P}\{^1\text{H}\}$ NMR spectra of compound <b>4</b> .....                                                                                                     | S9  |
| <b>Figure S8.</b> $^1\text{H}$ NMR and $^{31}\text{P}\{^1\text{H}\}$ NMR spectra of compound <b>5</b> .....                                                                                                     | S10 |
| <b>Figure S9.</b> $^1\text{H}$ NMR and $^{31}\text{P}\{^1\text{H}\}$ NMR spectra of compound <b>6</b> .....                                                                                                     | S11 |
| <b>Figure S10.</b> $^1\text{H}$ NMR and $^{31}\text{P}\{^1\text{H}\}$ NMR spectra of compound <b>7</b> .....                                                                                                    | S12 |
| <b>Figure S11.</b> The TGA curves for complexes <b>1–7</b> .....                                                                                                                                                | S13 |
| <b>Figure S12.</b> View of a section of the 1D chains of <b>5</b> and <b>7</b> extending along the <i>a</i> axis.....                                                                                           | S13 |
| <b>Figure S13.</b> Solid-state absorption spectrum of 3-bdppmapy, <b>6</b> and <b>7</b> at ambient temperature.....                                                                                             | S14 |
| <b>Figure S14.</b> UV-Vis spectra of the mixture of aqueous solution of RhB and <b>6</b> after irradiated under UV light for 0–4 hours.....                                                                     | S14 |
| <b>Figure S15.</b> Proposed mechanism of the catalyzed photodegradation of RhB.....                                                                                                                             | S14 |
| <b>Figure S16.</b> Photocurrent responses of <b>6</b> on ITO electrode in water or in the solution ( $0.1\text{ mmol}\cdot\text{L}^{-1}$ ) of ascorbic acid (AA) or methyl viologen (MV).....                   | S15 |
| <b>Figure S17.</b> Colour of the crystals of compounds <b>1</b> and <b>2</b> . ....                                                                                                                             | S15 |
| <b>Figure S18.</b> Frontier molecular orbitals (HOMO and LUMO) of 3-bdppmapy, <b>6</b> and <b>7</b> caculated with DFT                                                                                          |     |

|                          |     |
|--------------------------|-----|
| on the B3LYP level. .... | S16 |
|--------------------------|-----|

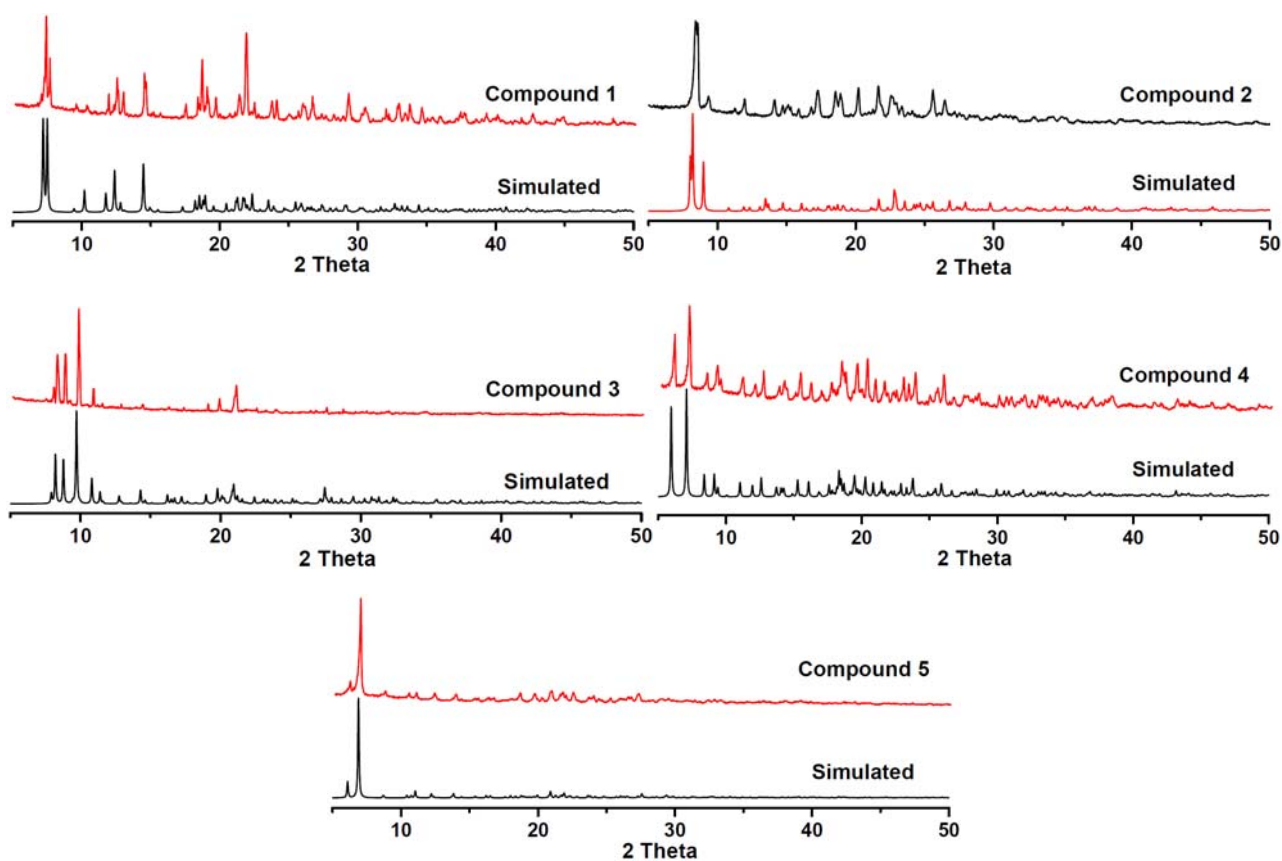

**Figure S1.** PXRD patterns for **1–5**: simulated from single crystal data (Black) and single-phase polycrystalline sample (Red).

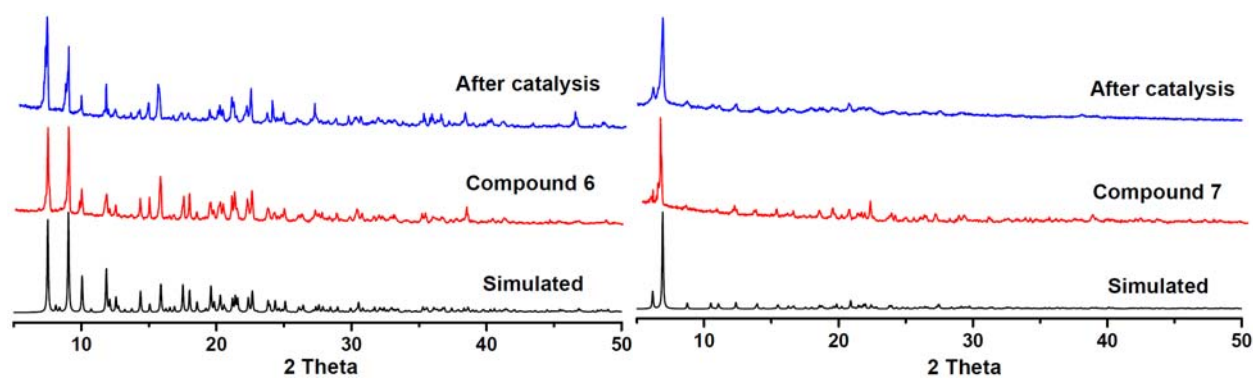

**Figure S2.** PXRD patterns for **6** and **7**: simulated from single crystal data (Black), single-phase polycrystalline sample (Red), and samples after catalyzed the photodegradation of RhB.

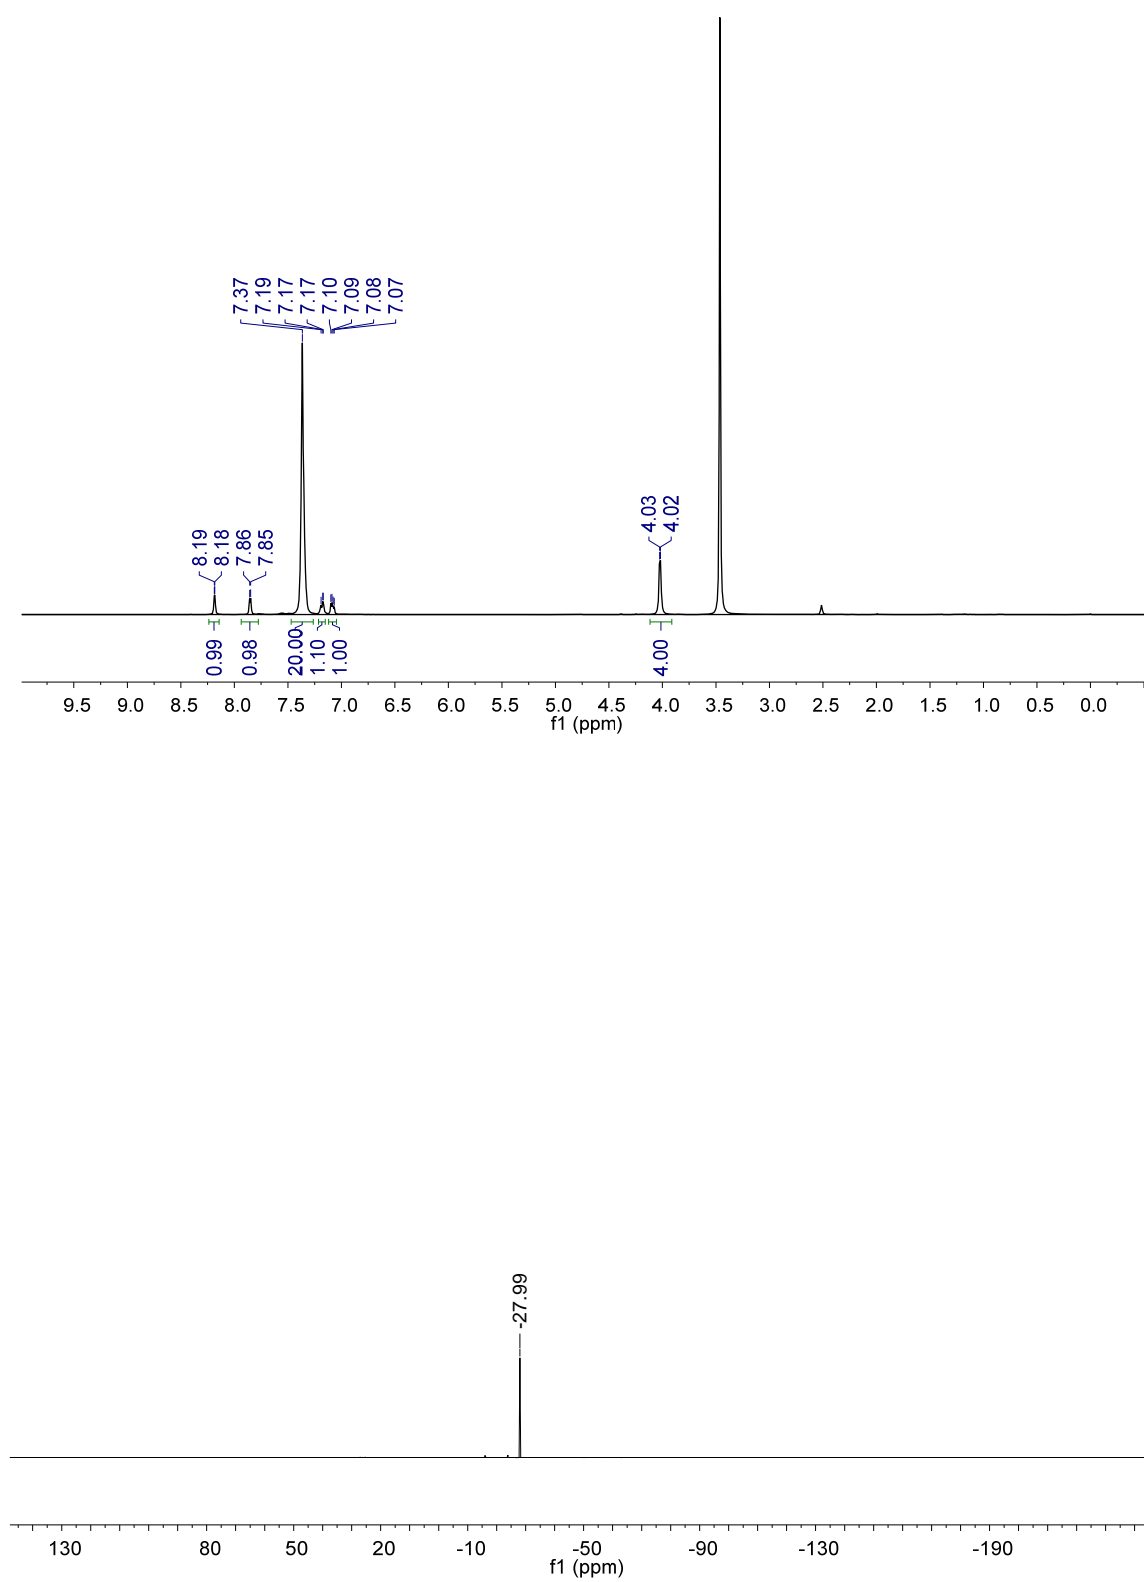

**Figure S3.**  $^1\text{H}$  NMR and  $^{31}\text{P}\{^1\text{H}\}$  NMR spectra of 3-bdppmapy.

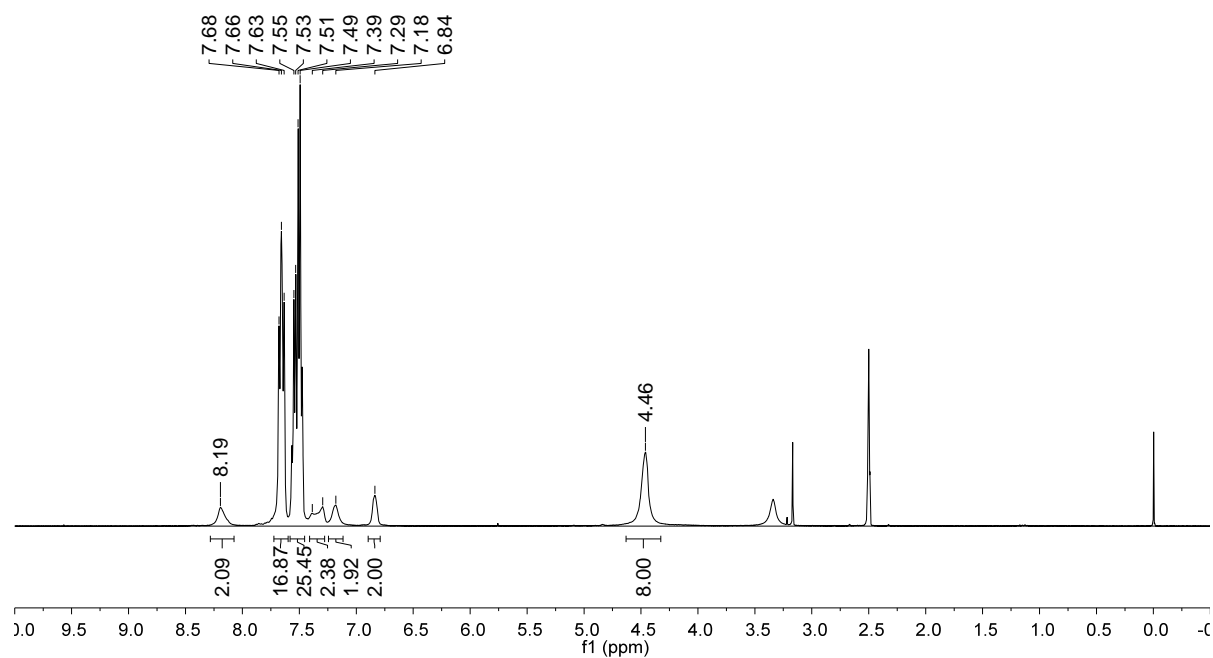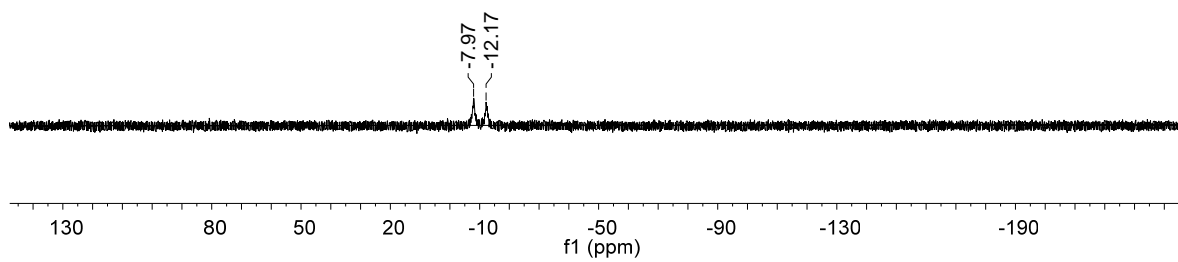

**Figure S4.** <sup>1</sup>H NMR and <sup>31</sup>P{<sup>1</sup>H} NMR spectra of compound **1**.

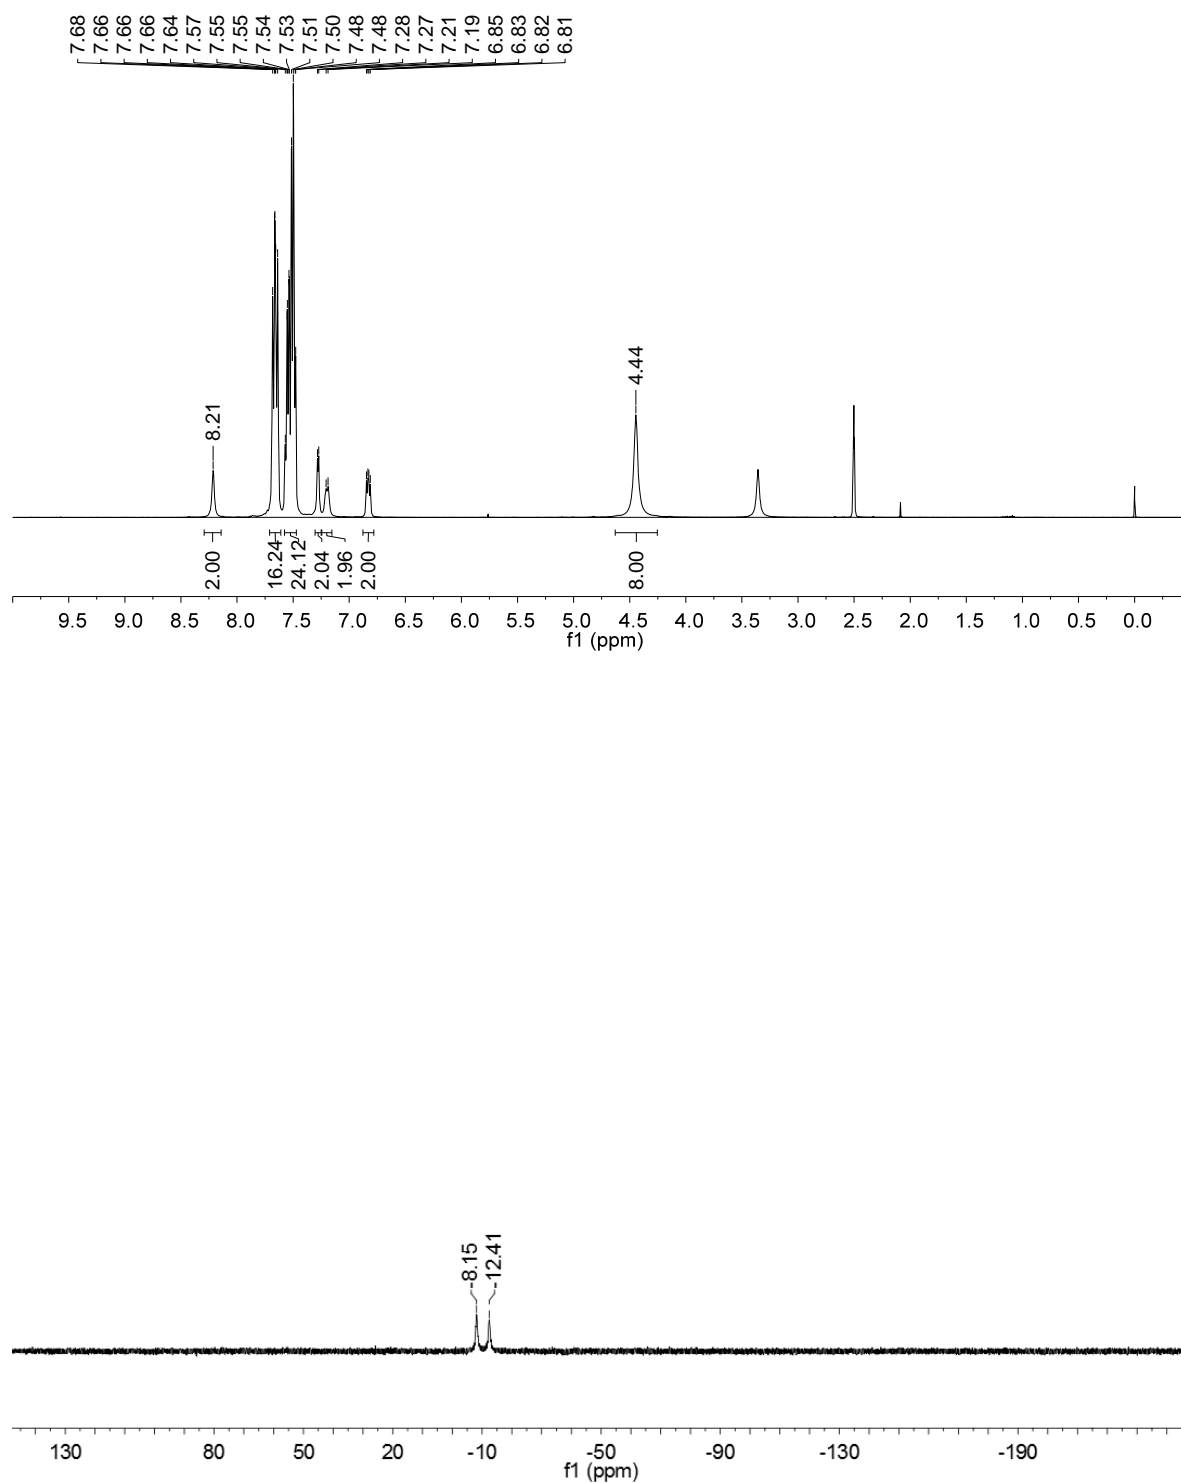

**Figure S5.**  $^1\text{H}$  NMR and  $^{31}\text{P}\{^1\text{H}\}$  NMR spectra of compound **2**.

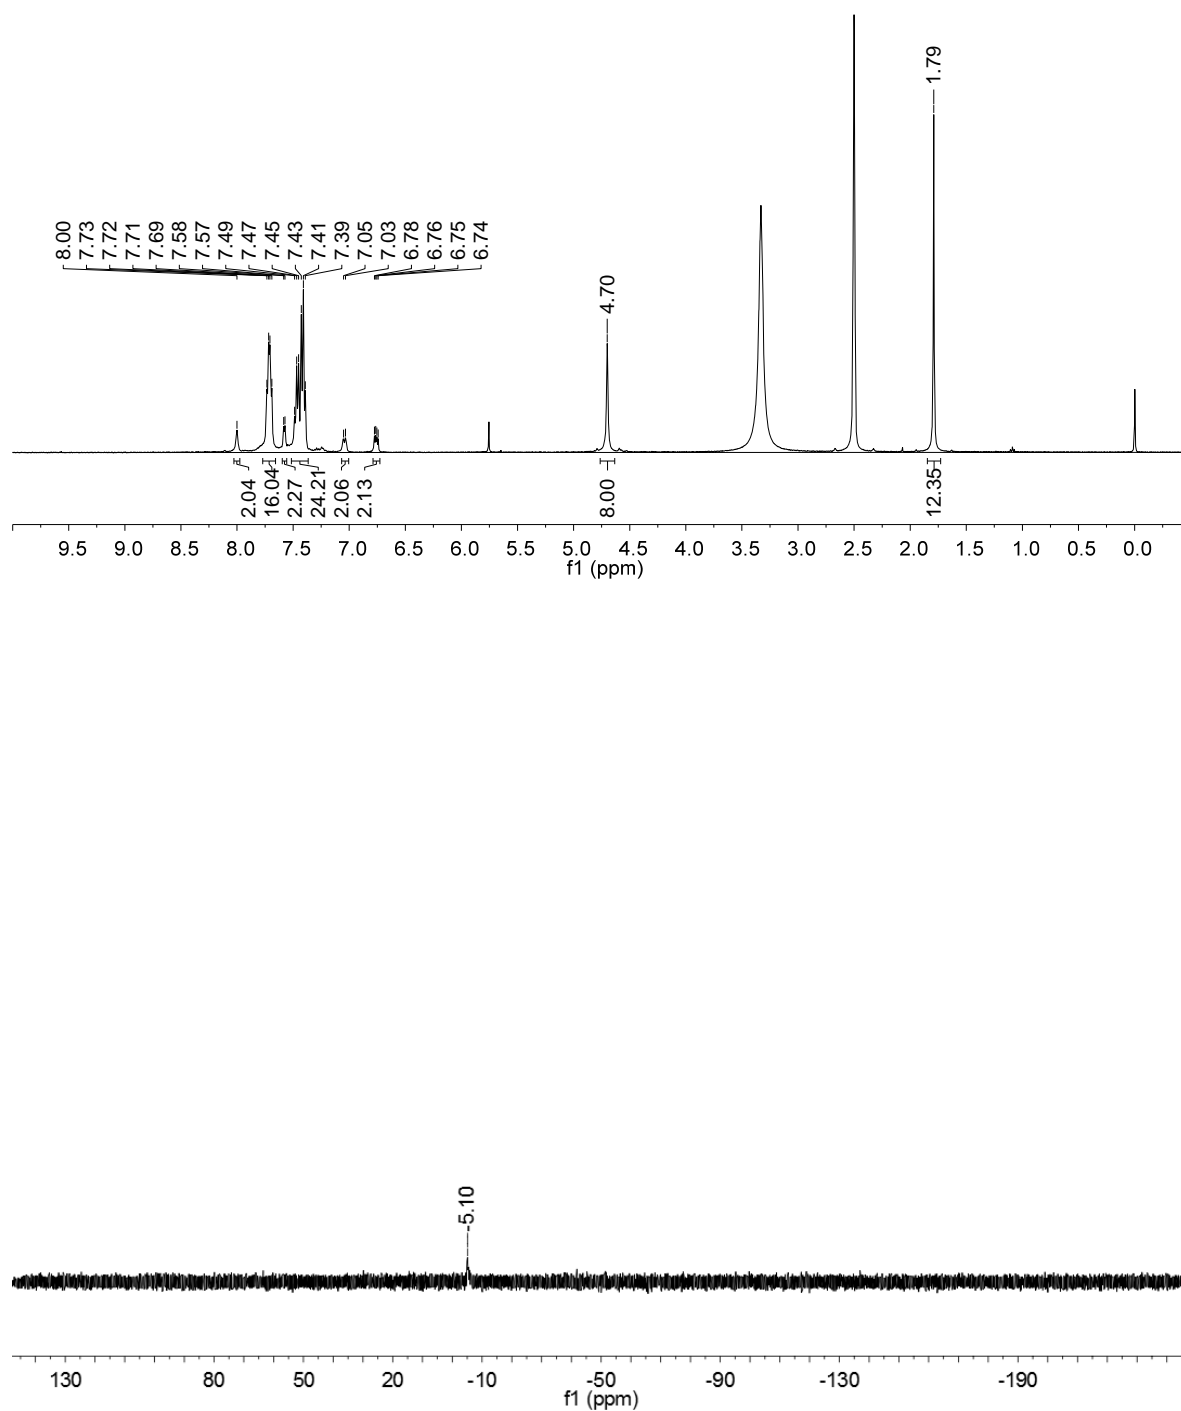

**Figure S6.**  $^1\text{H}$  NMR and  $^{31}\text{P}\{^1\text{H}\}$  NMR spectra of compound **3**.

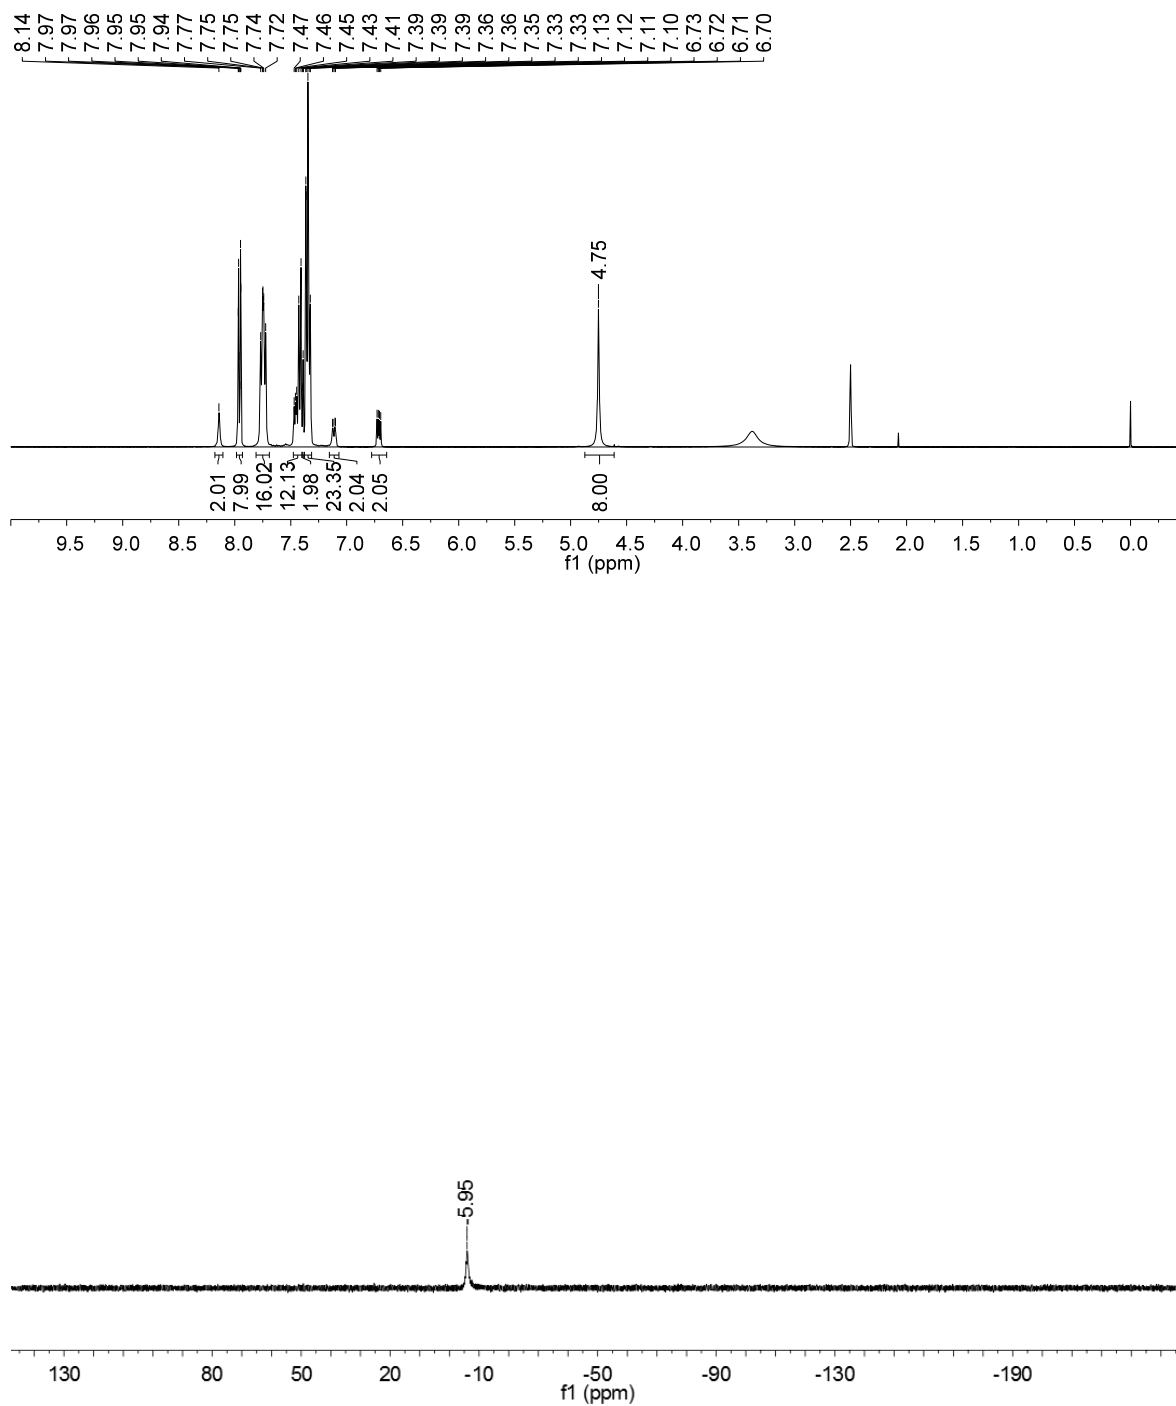

**Figure S7.**  $^1\text{H}$  NMR and  $^{31}\text{P}\{^1\text{H}\}$  NMR spectra of compound **4**.

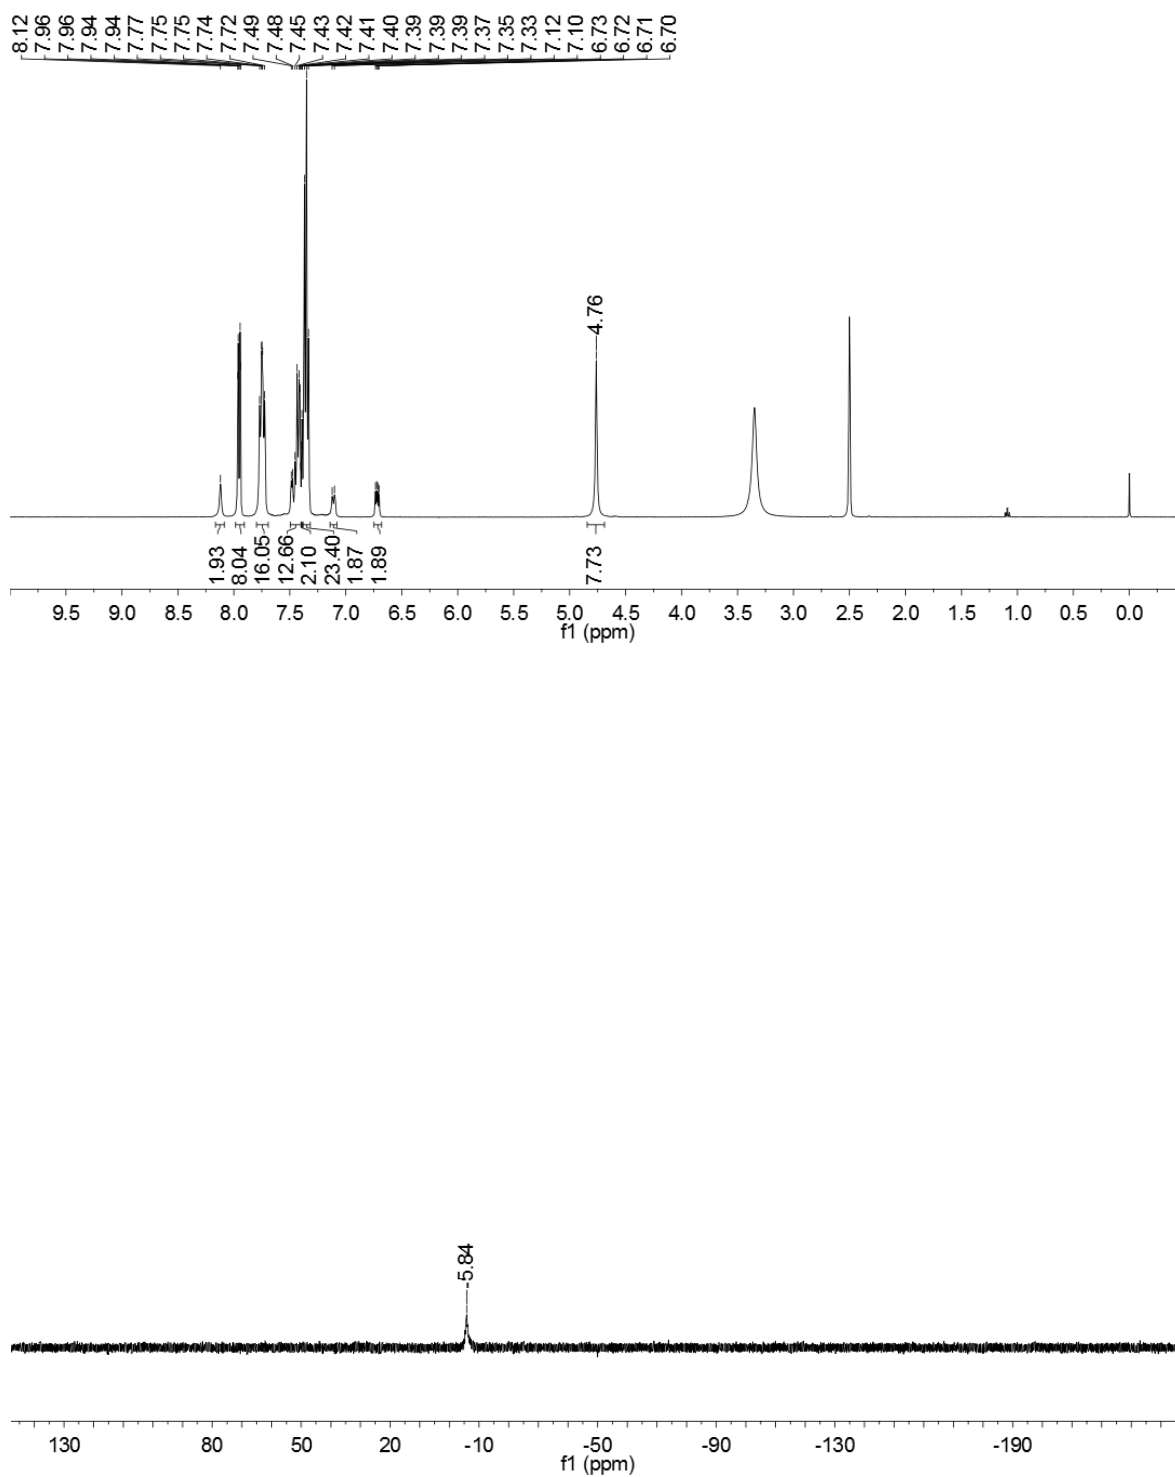

**Figure S8.**  $^1\text{H}$  NMR and  $^{31}\text{P}\{^1\text{H}\}$  NMR spectra of compound **5**.

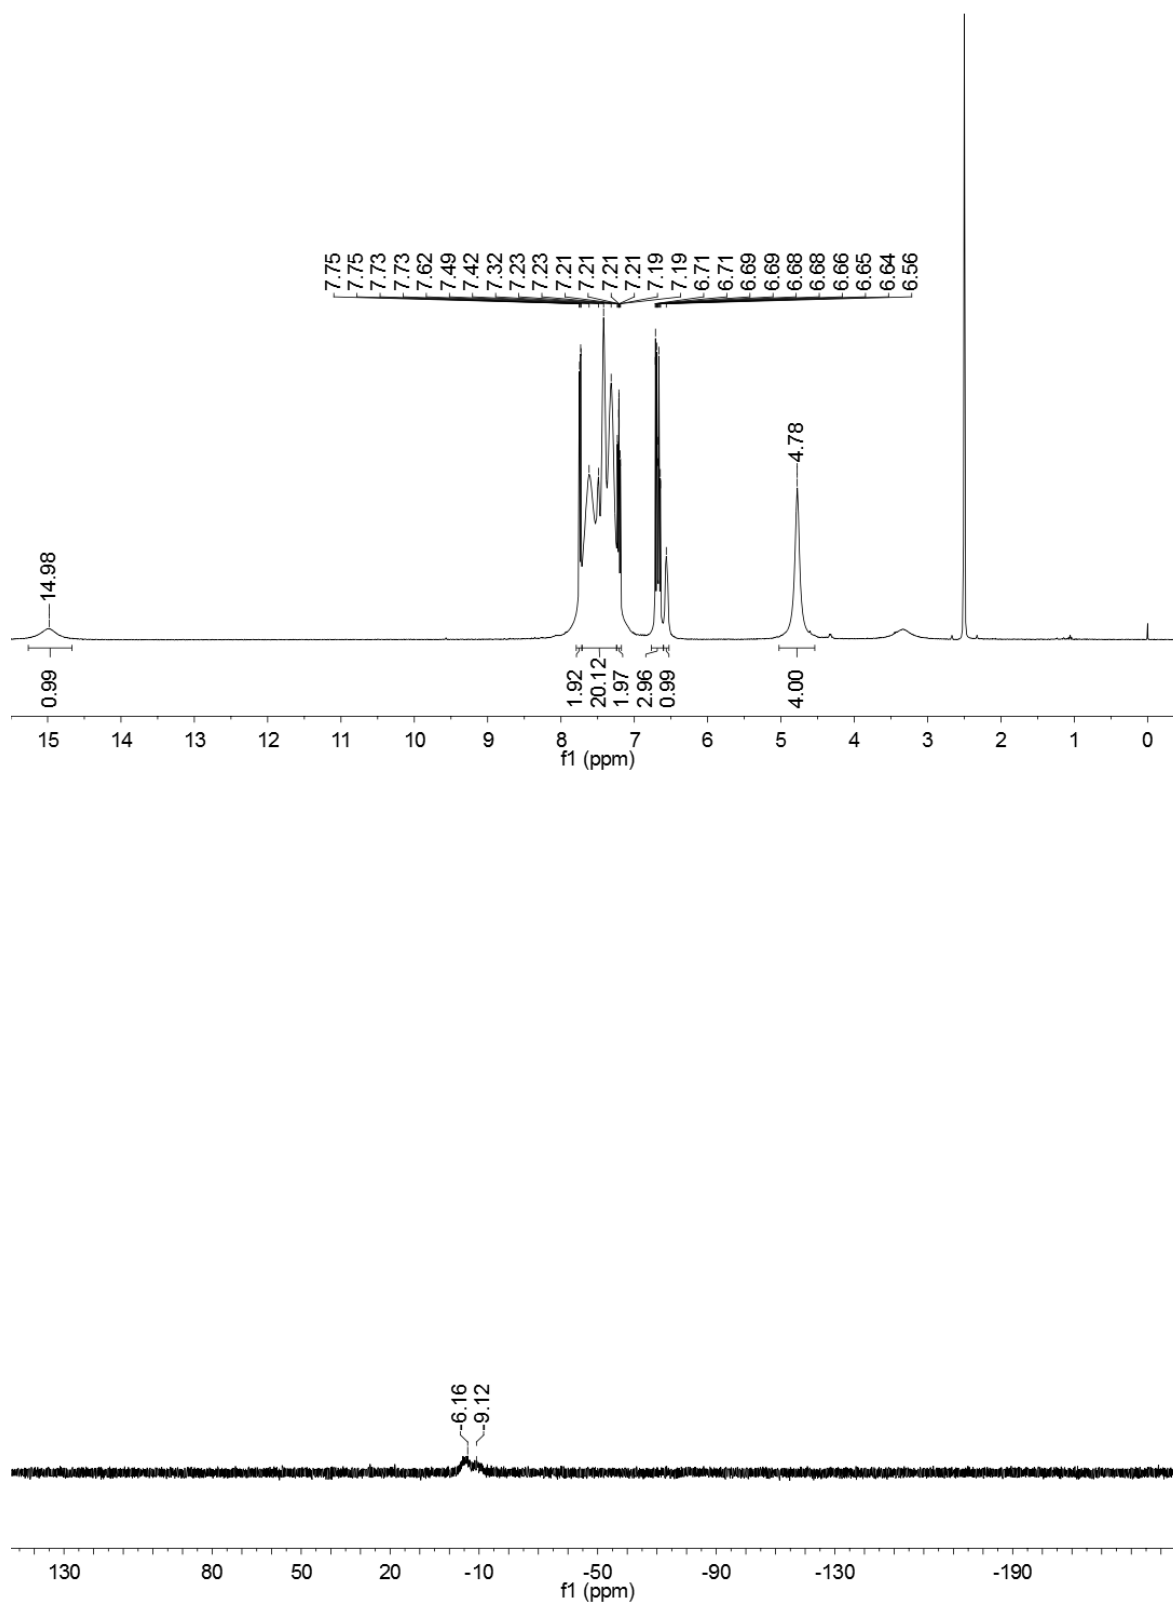

**Figure S9.**  $^1\text{H}$  NMR and  $^{31}\text{P}\{^1\text{H}\}$  NMR spectra of compound **6**.

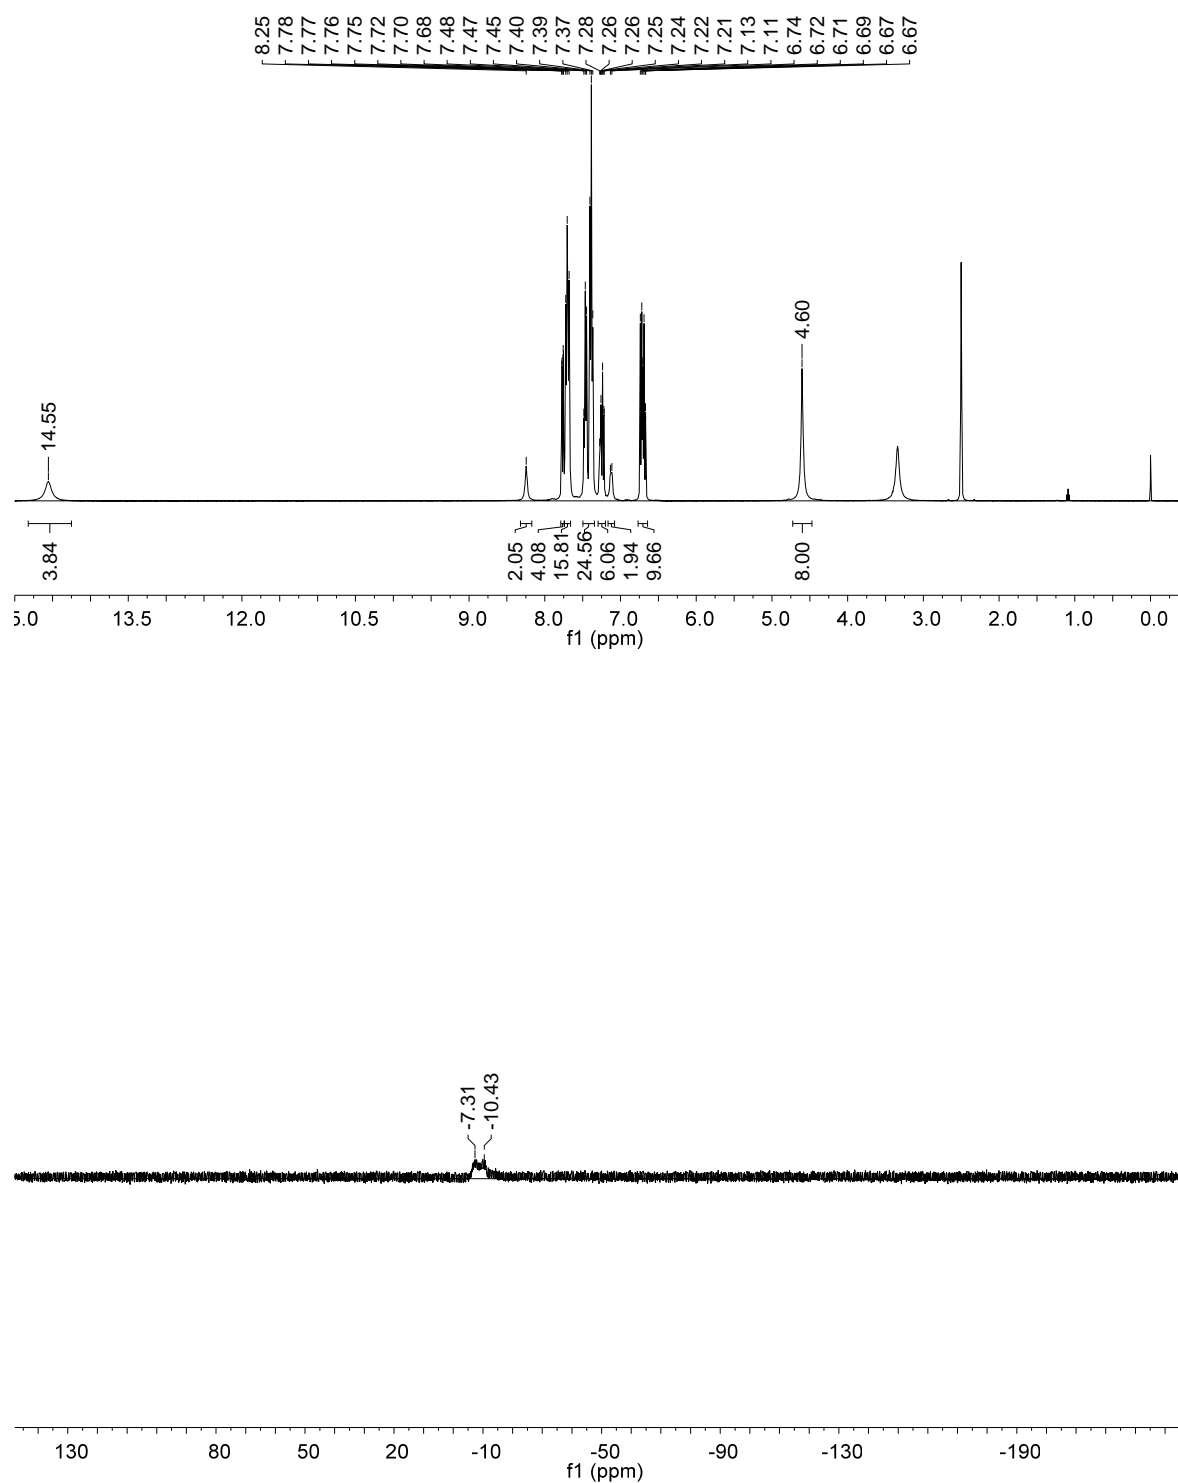

**Figure S10.**  $^1\text{H}$  NMR and  $^{31}\text{P}\{^1\text{H}\}$  NMR spectra of compound **7**.

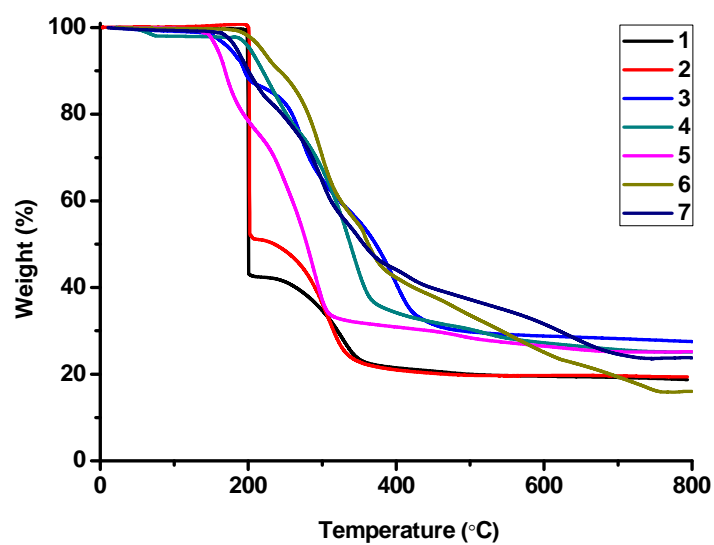

**Figure S11.** The TGA curves for complexes **1–7**.

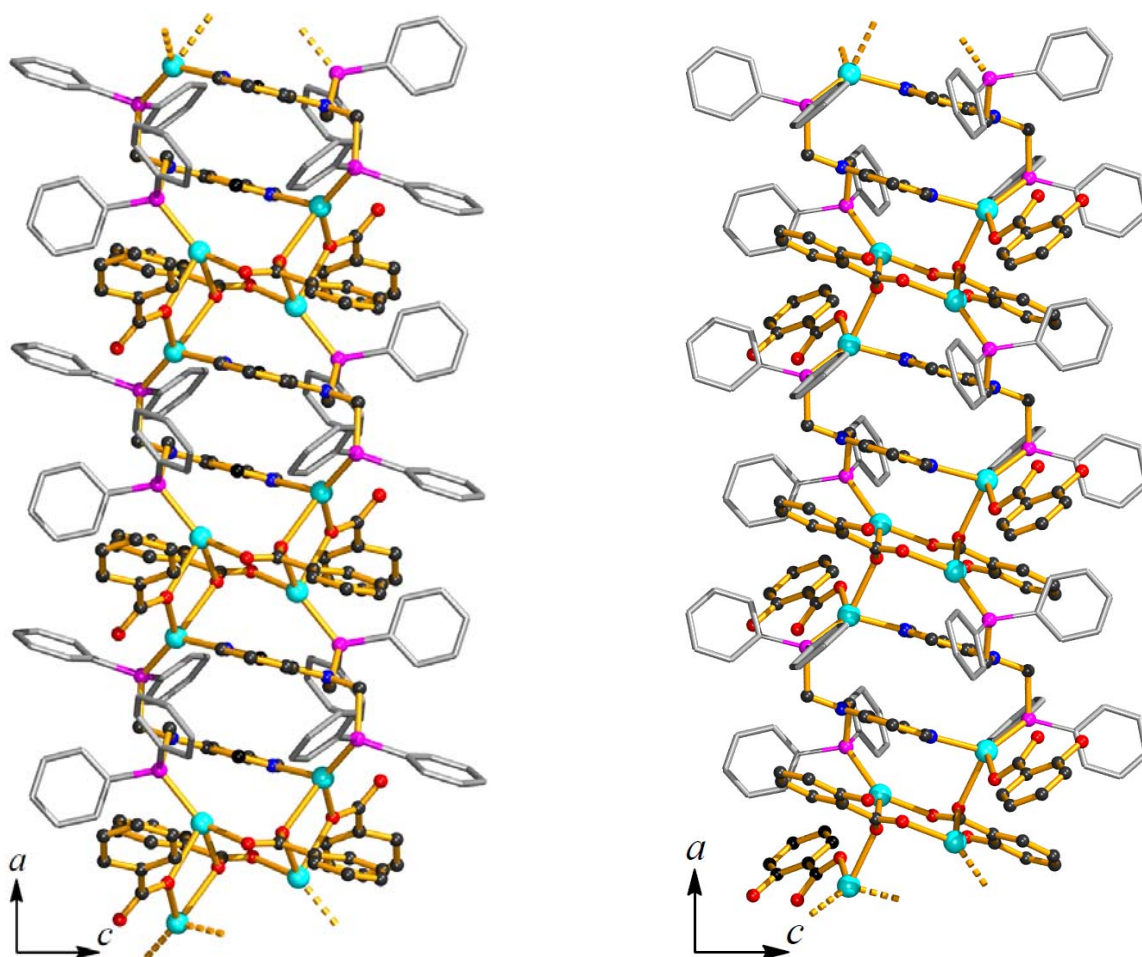

**Figure S12.** View of a section of the 1D chains of **5** (Left) and **7** (Right) extending along the *a* axis. All hydrogen atoms are omitted for clarity. Atom color codes: Ag, turquoise; P, pink; N, blue; O, red; C, black.

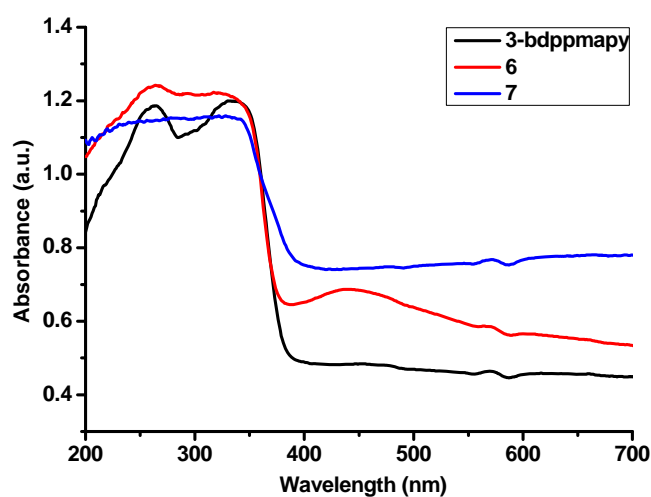

**Figure S13.** Solid-state absorption spectrum of 3-bdppmapy, **6** and **7** at ambient temperature.

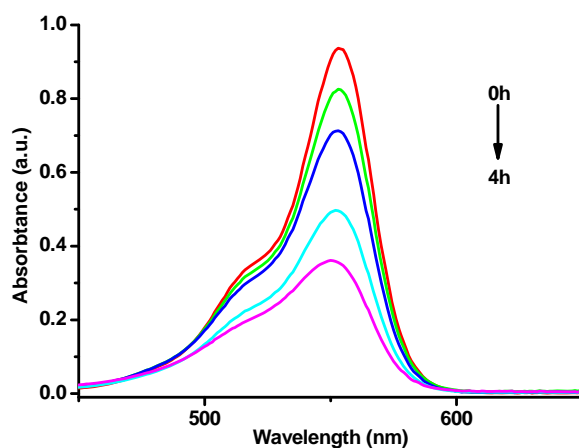

**Figure S14.** UV-Vis spectra of the mixture of aqueous solution of RhB and **6** after irradiated under UV light for 0–4 hours.

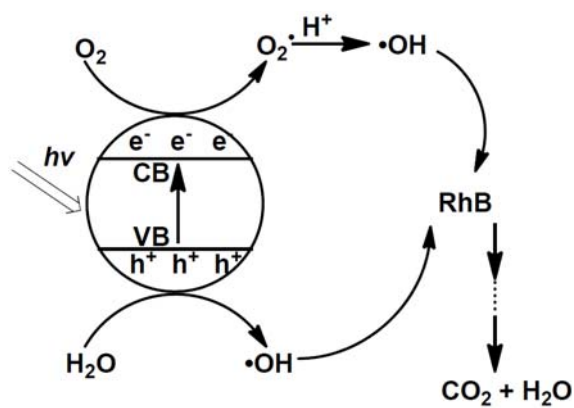

**Figure S15.** Proposed mechanism of the catalyzed photodegradation of RhB.

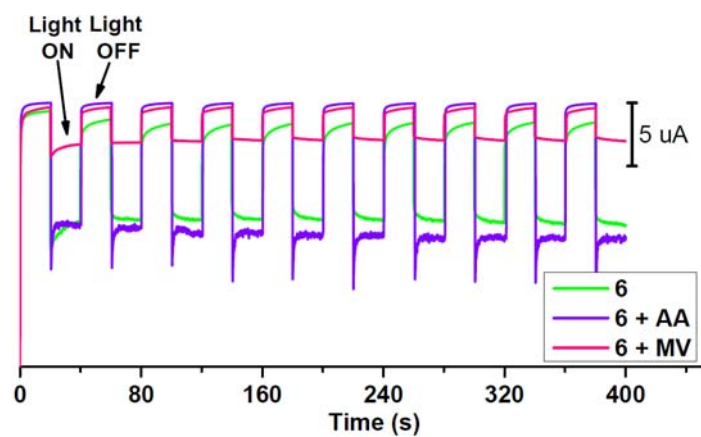

**Figure S16.** Photocurrent responses of **6** on ITO electrode in water (Green) or in the solution ( $0.1 \text{ mmol}\cdot\text{L}^{-1}$ ) of ascorbic acid (AA, Purple) or methyl viologen (MV, Pink). Conditions: bias  $0.75 \text{ V}$  vs SCE,  $[\text{Na}_2\text{SO}_4] = 0.1 \text{ mol}\cdot\text{L}^{-1}$ , UV power density =  $40 \text{ mW}\cdot\text{cm}^{-2}$ .

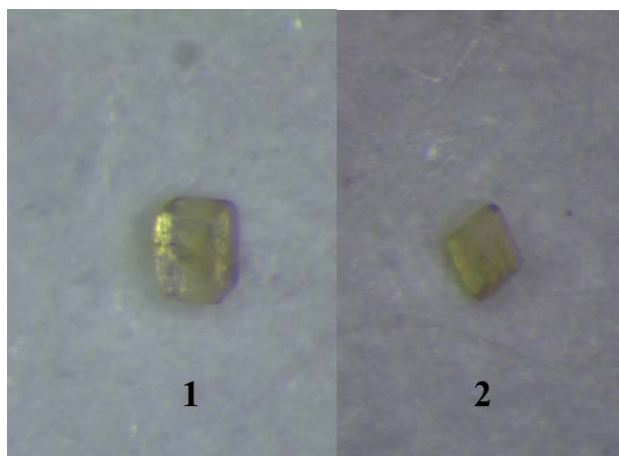

**Figure S17.** Colour of the crystals of compounds **1** and **2**.

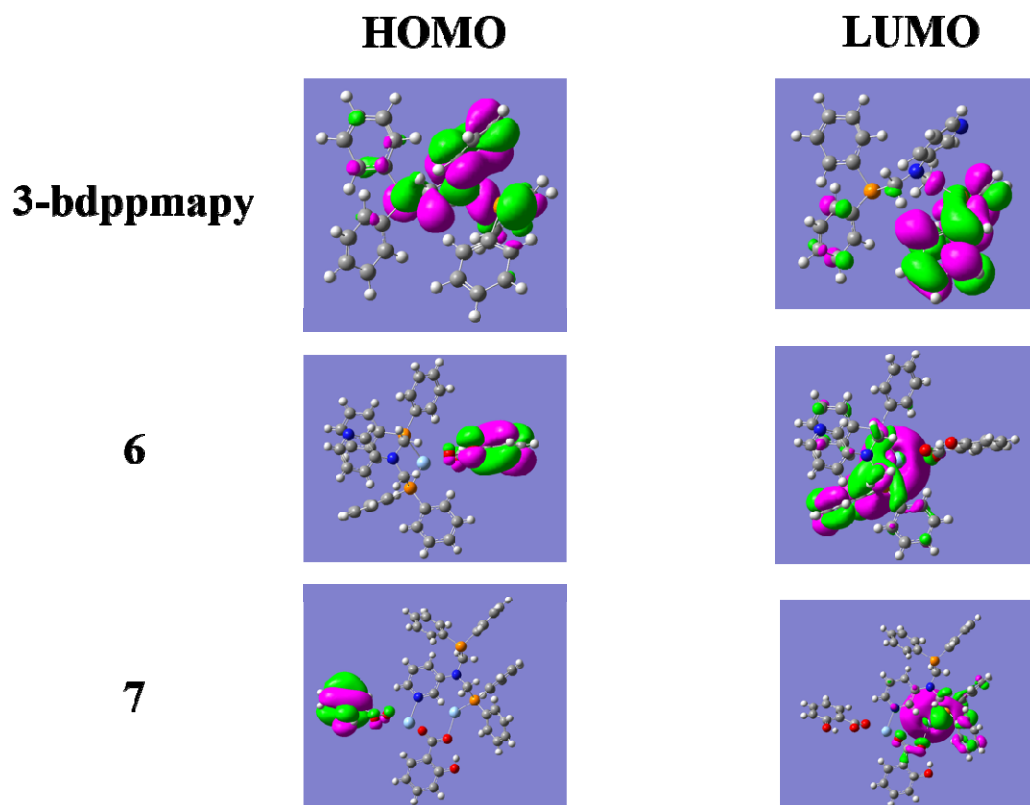

**Figure S18.** Frontier molecular orbitals (HOMO and LUMO) of 3-bdppmapy, **6** and **7** calculated with DFT on the B3LYP level.
